# Supplementary material
Source: PubMed Central journal article supplement (PMC2690001)
Supplement: 0903001106_0903001106SI.pdf [file 0903001106_0903001106SI.pdf]

# Supporting Information

Mikhaylova et al. 10.1073/pnas.0903001106

## SI Text

**cDNA Constructs.** Expression vectors for calneuron-1 and calneuron-2 were pEGFP-C1, pEGFP-N1, pcDNA3.1, pTrcHis2B, pMAL-c2x, and pET-SUMO for calneuron-1 and pEGFP-N1 and pET21a for caldendrin and NCS-1. The GST-PI-4K $\beta$  construct was obtained from T. Balla. mCherry-synaptophysin was a kind gift from A. Fejtova. shRNA constructs against calneuron-1 in pRS-GFP and scrambled controls were generated by Origene (ams Biotechnology). After RNAi construct validation [by immunostaining and Western blot (WB)] the most efficient sequence (5'-GCA-GCC-AAC-CAG-ATC-CTG-CGG-AGC-GGC-AT-3') and corresponding scrambled control was selected for further experiments.

**Antibodies.** Antibodies used were: anticalneuron-1 [rabbit, dilutions for immunoblotting (IB) 1:500; immunofluorescence (IF) 1:100] and anticalneuron-2 (rabbit, dilutions for IB 1:500, IF 1:100) generated against full-length proteins (1); mouse polyclonal antibody against calneuron-1 (Abnova; IB: 1:1,000, IF 1:500); calneuron-2/CABP7 MaxPab polyclonal antibody (Abnova; IB: 1:1,000); anticaldendrin raised in guinea pig (IF 1:200) using a GST-Caldendrin fusion protein as antigen. Specificity of these antibodies was proved by various means (blocking experiments with fusion protein, coimmunoprecipitation etc.). Other antibodies used were: mouse monoclonal anti-PI-4K $\beta$  and anti-SNAP25 (BD Transduction Laboratories; IB 1:5,000, IF 1:500 and IF 1:100, respectively); rabbit antisyntaxin 6 (Synaptic Systems; IB 1:1,000, IF 1:500); rabbit anti-NCS-1 (Santa Cruz Biotechnology; IB 1:1,000, IF 1:100); monoclonal anti-TGN38 (Novus Biologicals; IF 1:500); rabbit polyclonal anticalreticulin (Upstate Biotechnology; IF 1:200); rabbit monoclonal to GM130 (Abcam; IF 1:500); mouse monoclonal anti-GFP (Babco/Covance; IB 1:5,000), antisynaptophysin (Stressgene; IF 1:200); mouse monoclonal anti- $\beta$ -COP (IF 1:200) and mouse monoclonal anti- $\beta$ -Actin (WB 1:4,000) (Sigma); anti-mouse and anti-guinea pig HRP-linked secondary antibodies (DakoCytomation; IB 1:5,000; anti-rabbit IgG-HRP-linked antibodies (NEB; IB 1:5,000); anti-mouse and anti-rabbit Alexa Fluor 488 and Alexa Fluor 568 (Molecular Probes; IF 1:1,000); and Cy5-conjugated AffiniPure goat anti-mouse and anti-rabbit IgG (Dianova; IF 1:1,000).

**Protein Purification and Pull-Down Assay.** PI-4K $\beta$ -GST or GST were expressed in BL21 (DE3) bacteria (6 h after induction with 0.5 mM IPTG) and purified from the soluble fraction by glutathione agarose chromatography. Columns with Sepharose-bound GST-PI-4K $\beta$  or GST were extensively washed with Ca<sup>2+</sup>-free (Chelex100 treated) TBS buffer, and aliquots of these beads were used for pull-down assays. For PI-4K $\beta$  activity assays the enzyme was cleaved from the GST tag with thrombin. Untagged caldendrin, calneuron-1, and NCS-1 were purified after expression with pET21 vectors (for NCS-1 and caldendrin) and pTrcHis2B (for calneuron-1) using hydrophobic columns as described (2). His-SUMO-calneuron-1 was used for competition pull-down assays and the surface plasmon resonance studies. The protein was induced for 4 h at 37 °C and then purified by using ProBond resin (Invitrogen) according to the manufacturer. For the pull-down assay calneuron-1-GFP, calneuron-2-GFP, or GFP heterologously overexpressed in COS-7 cells was extracted with lysis buffer in the presence of 2 mM CaCl<sub>2</sub> and 1 mM MgCl<sub>2</sub> (Ca<sup>2+</sup> buffer) or 2 mM EGTA and 1 mM MgCl<sub>2</sub> (Ca<sup>2+</sup>-free buffer). Ten micrograms of GST-PI-4K $\beta$  or GST immobilized on

Sepharose beads was washed with the corresponding buffers and incubated overnight at 4 °C with 500  $\mu$ L of the COS-7 cell extract. After extensive washing with the corresponding buffers protein complexes were eluted with 30  $\mu$ L of 2 $\times$ SDS sample buffer and processed for IB. For the competition pull-down 2  $\mu$ g of GST-PI-4K $\beta$  or 0.5  $\mu$ g of GST bound to the beads was washed with TBS buffer containing 1 mM MgCl<sub>2</sub>, 2 mM DTT, and different concentrations of CaCl<sub>2</sub>: 0 (2 mM EGTA), 0.2, 0.5, and 1  $\mu$ M. Then equimolar amounts of His-SUMO-calneuron-1 and NCS-1 (0.6 and 0.5  $\mu$ g) were diluted in corresponding buffers and added to the beads. After incubation for 1 h at the room temperature beads were extensively washed, eluted with 20  $\mu$ L of 2 $\times$  SDS sample buffer, and checked by IB with rabbit calneuron-1 or NCS-1 antibody. The same amounts of calneuron-1 or NCS-1 (0.6 and 0.5  $\mu$ g) were used for the input. The competition experiment was done 5 times and then immunoblots were analyzed. The amounts of NCS-1 bound to GST control at each buffer condition were subtracted from GST-PI-4K $\beta$  pull-down. The conditions with a maximal binding of NCS-1 to GST-PI-4K $\beta$  were taken as 100% and deviations were calculated for each condition.

**Subcellular Fractionation, Gel Filtration, and Immunoblotting.** Subcellular fractionation was performed as described (3). Microsomal fractions obtained during subcellular fractionation were further extracted with lysis buffer [10 mM Tris-HCl, 150 mM NaCl, 1% Triton X-100, 2 mM DTT, protease inhibitor mixture Complete (Roche), pH 7.5]. Preparations were done at low Ca<sup>2+</sup> concentrations with 2 mM EDTA or at high Ca<sup>2+</sup> concentrations with 2 mM Ca<sup>2+</sup> in the microsomal preparation, which were separated on a gel filtration FPLC column (Amersham Biosciences/GE Healthcare). Fractions 20–80 were precipitated with acetone overnight at –20 °C, washed with ice-cold 70% ethanol, and lyophilized. Dry pellets were solubilized in 50  $\mu$ L of SDS/PAGE loading buffer and analyzed by IB.

**Surface Plasmon Resonance Analysis.** Binding studies for calneuron-1, PI-4K $\beta$ , and myr-NCS-1 were carried out by using the Biacore 2000 instrument and sensor chip CM5 at 25 °C. His-SUMO-calneuron-1 was coupled to the carboxymethylated dextran matrix of a sensor chip cell according to the manufacturer's instructions. After equilibrating the sensor chip with flow buffer HBS-P [10 mM Hepes (pH 7.4), 150 mM NaCl, 0.005% Surfactant P20] at a flow rate of 5  $\mu$ L/min, the Dextran matrix was activated with a 7-min pulse of 50 mM *N*-hydroxysuccinimide/200 mM *N*-ethyl-*N'*-(dimethylaminopropyl)-carbodiimide at a flow rate of 5  $\mu$ L/min. Subsequently, his-SUMO-calneuron-1 was immobilized at the surface of the sensor chip cell by injecting a 7-min pulse of ligand solution (20  $\mu$ g/mL of His-SUMO-calneuron-1 in 10 mM sodium acetate, pH 4.5). Finally, the excess of reactive groups on the chip surface was deactivated with a 7-min pulse of 1 M ethanolamine hydrochloride, pH 8.5, at a flow rate of 5  $\mu$ L/min. For binding studies including GST-PI-4K $\beta$  (or GST control) and NCS-1 the purified proteins were diluted at the indicated concentrations in the continuous flow buffer HBS-P containing various Ca<sup>2+</sup> and/or Mg<sup>2+</sup> concentrations. Each analytic run was performed at 20  $\mu$ L/min flow rate under the following conditions: 1 min equilibration of the chip with the indicated analysis buffer. Afterward the analyte was injected in a 3-min pulse (association time) followed by a 3-min pulse with analysis buffer alone (dissociation time). Individual runs were finished with the regeneration of the chip

matrix using a 2-min pulse of 50 mM NaOH at a flow rate of 5  $\mu\text{L}/\text{min}$  and a terminating 5-min pulse with flow buffer to equilibrate the chip surface again. For the final graph the binding of GST control alone with NCS-1 was subtracted from the corresponding GST-PI-4K $\beta$  values. For estimation of binding of NCS-1 to GST-PI-4K $\beta$  in presence or absence of  $\text{Mg}^{2+}$  and different  $\text{Ca}^{2+}$  concentrations NCS-1 was directly coupled to the sensor chip and GST-PI-4K $\beta$  was injected as described above. The molar binding activities were calculated based on the equation from ref. 4.

**Steady-State Fluorescence Studies and ITC.** Intrinsic fluorescence spectra were recorded on a Hitachi F-4500 fluorescence spectrophotometer. Trp fluorescence was recorded between 300 and 450 nm with the excitation wavelength set at 295 nm.  $\text{Ca}^{2+}$  and  $\text{Mg}^{2+}$  binding to calneurons and NCS-1 was evaluated by a Microcal VP-ITC instrument as described (5, 6).

**PI-4K $\beta$  Activity Assay.** The assay was carried out in a final volume of 120  $\mu\text{L}$  containing 50 mM Tris (pH 7.5), 20 mM  $\text{MgCl}_2$ , 1 mM EGTA, 0.5 mg/mL BSA, 80  $\mu\text{g}$  of substrate (PI) in micelles containing 0.4% Triton X-100 and ATP (mixture of 500  $\mu\text{M}$  cold ATP and 2  $\mu\text{Ci}$  ATP- $\text{P}^{32}$ ). Reactions were carried out in  $\text{Ca}^{2+}$ -free conditions (2 mM EGTA) or in the presence of 2 mM  $\text{Ca}^{2+}$  at room temperature. Reactions were initiated by adding the ATP mixture. The reaction was terminated after 30 min by adding 3 mL of chloroform/methanol/0.6 M HCl (200:100:0.75 vol/vol%). The labeled phospholipids were extracted with 1.5 mL of chloroform/methanol/0.6 M HCl (3:48:47, vol/vol/vol%). The organic phase was transferred into a scintillation vial. After evaporation, 5 mL of the scintillation fluid containing 1.3 mM POPOP and 22 mM PPO in Toluene were added and radioactivity was measured by liquid scintillation counter. A blank value was subtracted and data are represented as the percentage of basal kinase activity (100%) with or without  $\text{Ca}^{2+}$ .

**PIP Assay.** The PIP assay was carried out with a PI(4)P mass strip kit (MoBiTec) in Cos-7 cells. Flasks (75  $\text{cm}^2$ ) were transfected and after 48 h cells were harvested with cold 1 $\times$  TBS buffer, homogenized, and centrifuged at 1,000  $\times g$  for 10 min at 4  $^\circ\text{C}$ . The pellet fraction was resuspended in 150  $\mu\text{L}$  of TBS and 5  $\mu\text{L}$  was taken for the IB with anti- $\beta$ -actin (loading control) and antisyntaxin 6 (Golgi marker control). The remaining pellet was used for PI(4)P extraction according to the protocol from the manufacturer. Briefly, the pellet was washed twice with cold 5% TCA/1 mM EDTA buffer by centrifugation and then neutral lipids were extracted by  $\text{MeOH}/\text{CHCl}_3$  (2:1). The obtained pellet was homogenized in  $\text{CHCl}_3/\text{MeOH}/12 \text{ M HCl}$  (40:80:1) for the acetic lipid extraction. The supernatant was collected, then organic and aqueous phases were separated by adding  $\text{CHCl}_3$  and 0.1 M HCl. The organic phase was transferred into a fresh tube and lyophilized. Dry lipids were reconstituted with 10  $\mu\text{L}$  of  $\text{CHCl}_3/\text{MeOH}/\text{H}_2\text{O}$  (1:2:0.8) and 2  $\mu\text{L}$  was spotted onto a PI(4) strip. Strips were dried, blocked with 3% BSA and incubated with PI(4)P detector solution for 1 h at room temperature. After extensive wash with 1 $\times$  PBS the strip was incubated for 45 min with secondary detector solution, washed again, and incubated with tertiary detector solution for another 45 min. After the final wash the signals on the membrane were detected by chemiluminescence. Films were scanned, and the optical density of the spots was analyzed by ImageJ.

**FRAP and Life Imaging Experiments.** FRAP experiments were carried out by using a confocal laser scanning microscope (Leica M IRE2) equipped with a krypton-argon-ion laser (488/568/647 nm) and an acousto-optic-tunable filter for selection and intensity adaptation of laser lines. DIV 5–7 cortical neurons 24 h after transfection with mCherry-synaptophysin and GFP or calneu-

ron-1-GFP and 72 h after for the calneuron-1 shRNA were transferred into the recording chamber with ACSF (125 mM NaCl, 2.5 mM KCl, 2 mM  $\text{MgSO}_4$ , 2 mM  $\text{Ca}^{2+}$ , 10 mM glucose, 30 mM Hepes, pH 7.3) at 37  $^\circ\text{C}$ . A 488-nm laser line was used to monitor the GFP channel and a 568-nm line was used for both imaging of mCherry and photobleaching. A 63 $\times$  oil objective and 2 $\times$  zoom were used. Pictures were taken every 5 min as a z-stack (300-nm z-step) with resolution 524  $\times$  524 pixels. The first 5 images were recorded before the bleaching to establish a baseline and the stabilizing of the coverslip in the recording chamber. Then, the first 15- to 20- $\mu\text{m}$  segment of the longest neurite (axon) was bleached with the maximal laser power for 5–8 min (12 $\times$  zoom) because of the high photo-stability of mCherry, followed by 1 h of postbleach recordings at the same conditions as for the baseline. After the bleaching, 100  $\mu\text{M}$  ATP was added for 3 min to increase the intracellular  $\text{Ca}^{2+}$  and stimulate the Golgi trafficking in the case of calneuron-1-GFP or GFP transfection. For the BAPTA experiments cells were preincubated with 10  $\mu\text{M}$  of BAPTA-AM for 1 h at 37  $^\circ\text{C}$  in serum free medium. Images were analyzed with ImageJ (National Institutes of Health). Z-stacks were processed as maximal projections, and a 10- $\mu\text{m}$  initial segment of the bleached neurite was selected as the region of interest (ROI). In each experiment, the ROI was applied to the all time points and the mean gray value (represented as 255 different gray values) was calculated. Data were normalized on the photo-bleaching during the image acquisition by introducing the “bleaching coefficient” (unrelated area with the background fluorescence was monitored during the experiment after the neurite was specifically bleached, initial fluorescence intensity was taken as 1 and each change of the intensity was calculated as the proportion). For the evaluation of percentage of FRAP the initial fluorescence was taken as 100% and data were graphically plotted. The differences between fluorescence intensity after bleaching at time point 0 min and time point 60 min were taken as percentage of recovery.

For the line analysis of vesicle trafficking the same groups as described above were studied. For the BAPTA-AM experiments cells were preincubated for 1 h at 37  $^\circ\text{C}$ . Coverslips were transferred to an experimental chamber on the stage of an upright microscope (Zeiss AxioScope FS). Cells were continuously superfused with Hepes-buffered ACSF at 35  $^\circ\text{C}$ . mCherry fluorescence was excited at 575 nm. Excitation light was directed onto the specimen via a 60 $\times$  objective and a 580-nm dichroic. Emission was filtered with a 590-nm long-pass filter. Images were acquired every 30 s (exposure times 200–500 ms) via a water-immersion objective (LUMPLFL 60 $\times$  W; Olympus) and a cooled CCD camera (Pentamax; Princeton Instruments). Data acquisition was performed with Metafluor software (Universal Imaging). For off-line analysis and processing of fluorescence images ImageJ software was used.

**Analysis of Golgi Complexes and PTVs in Primary Neurons.** Transfected primary cortical neurons were fixed at DIV5 and stained with TGN markers (syntaxin-6, TGN38), the endosomal/Golgi marker  $\beta$ -Cop, or the *cis*-Golgi marker GM130 in combination with PI-4K $\beta$  or different presynaptic markers (SNAP25, Piccolo, synaptophysin). For the colocalization study images were scanned with a confocal microscope (see above) as 300-nm z-stacks (63 $\times$  oil objective) and calculated as maximum intensity projections with ImageJ software (see above). The size of the Golgi complex was analyzed 24 h after transfection with calneuron-1-GFP and GFP-calneuron-2, NCS-1-GFP, or GFP constructs and 72 h after introduction of the calneuron-1 shRNA. Images were scanned as 126-nm z-stacks (63 $\times$  oil objective and 4 $\times$  confocal zoom) and analyzed with Imaris image analysis software (version 6.2, Bitplane). The syntaxin-6 channel was reconstructed as 3D with the same parameters for all groups and then volume, total surface area, and the number of TGN clusters

were measured. For the analysis of PTV number MAP2 was used as a dendritic marker and Piccolo was used as a marker of PTVs. The longest MAP2-negative neurite was identified as the axon. For quantitative analysis 50- $\mu\text{m}$  stretches were taken 30  $\mu\text{m}$  away from the cell body to exclude the axon initial segment, scanned as z-stack (63 $\times$  oil objective, 2 $\times$  zoom) and then transferred to the maximal projection as described above. The GFP channel was adjusted to saturation level and inverted to a binary image, which was then used to calculate the total area of the axonal segment. Subsequently, the Piccolo immunofluorescence was also con-

verted to a binary image with the same threshold for all groups. Only the area overlapping with the GFP image was analyzed. Data are presented as the ratio between the area covered by PTVs (Piccolo positive) and the total area of the axon (GFP positive). GFP-transfected neurons were taken as control (set to 100%) and percentage deviations were calculated. For analysis of PTV size and intensity of fluorescence for Piccolo on PTVs, the mask created from the binary Piccolo image was applied to the original unmodified Piccolo channel. The size and fluorescence intensity of ROI was measured.

1. Mikhaylova M, et al. (2006) Neuronal  $\text{Ca}^{2+}$  signaling in the brain via caldendrin and calneurons. *Biophys Biochem Acta Mol Cell Res* 1763:1229–1237.
2. Aravind P, et al. (2008) Regulatory and structural EF-hand motifs of neuronal calcium sensor-1:  $\text{Mg}^{2+}$  modulates  $\text{Ca}^{2+}$  binding,  $\text{Ca}^{2+}$ -induced conformational changes, and equilibrium unfolding transitions. *L Mol Biol* 376:1100–1115.
3. Seidenbecher CI, et al. (1998) Caldendrin, a novel neuronal calcium-binding protein confined to the somato-dendritic compartment. *J Biol Chem* 273:21324–21331.
4. Catimel B, et al. (1997) Kinetic analysis of the interaction between the monoclonal antibody A33 and its colonic epithelial antigen by the use of an optical biosensor. A comparison of immobilization strategies. *J Chromatogr A* 776:15–30.
5. Wu YQ, Lin X, Liu CM, Jamrich M, Shaffer LG (2001) Identification of a human brain-specific gene, calneuron 1, a new member of the calmodulin superfamily. *Mol Genet Metab* 72:343–350.
6. Zhai RG, et al. (2001) Assembling the presynaptic active zone: A characterization of an active zone precursor vesicle. *Neuron* 29:131–143.

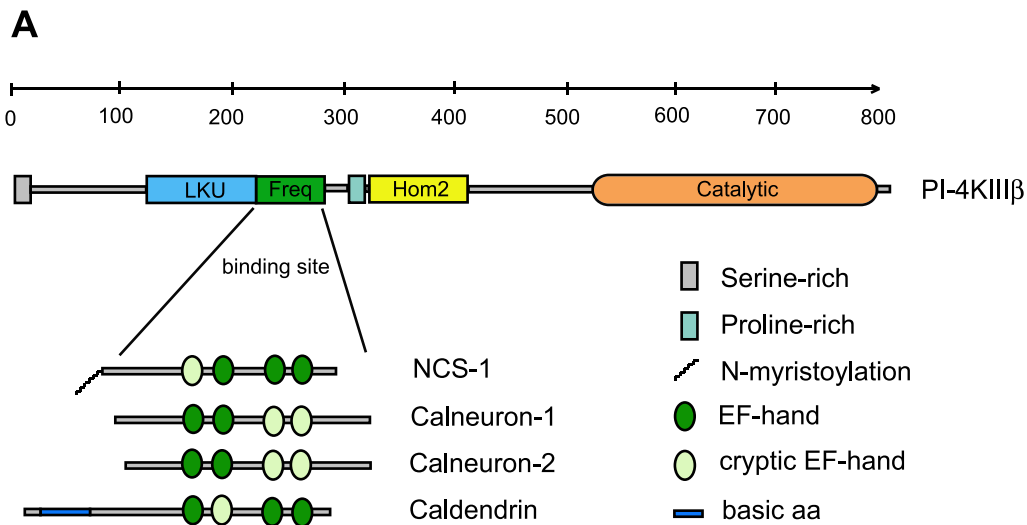

**B**

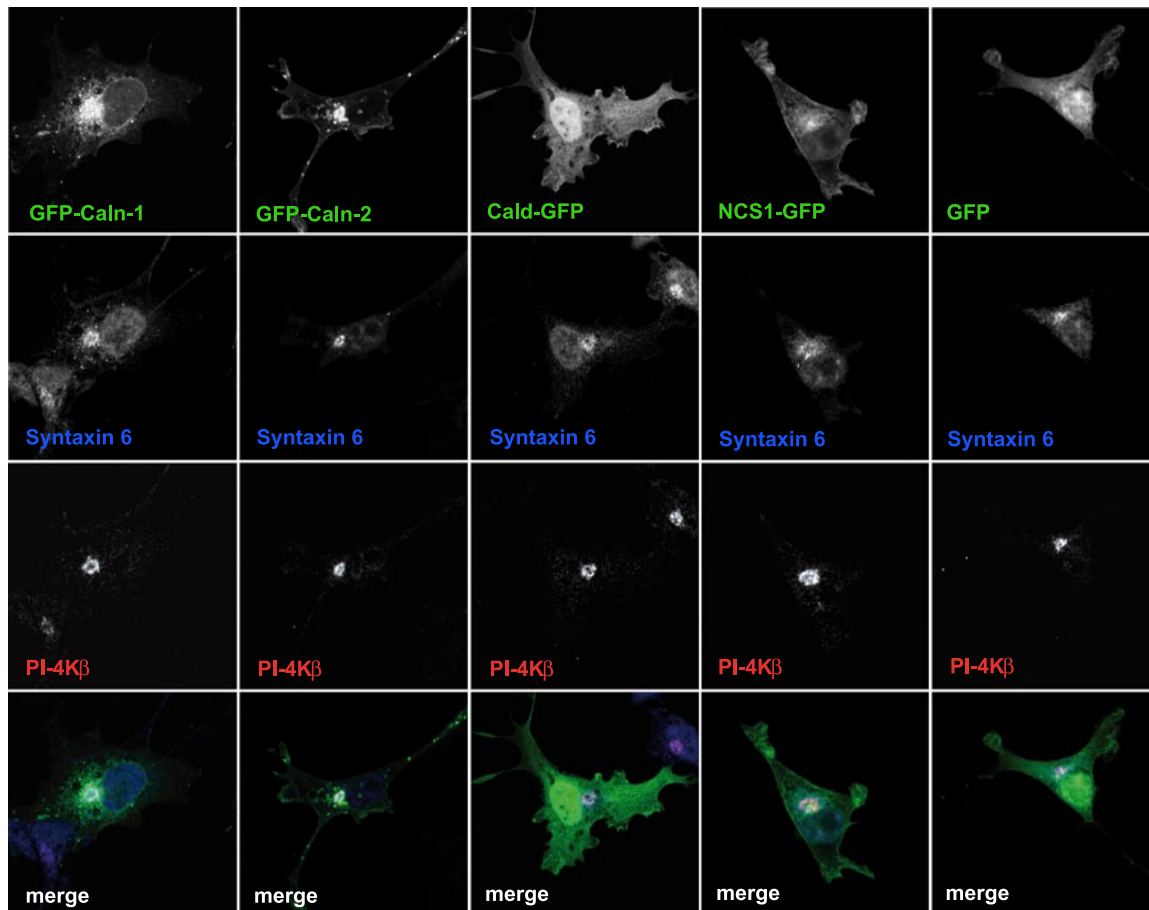

**Fig. S1.** (A) Primary structure of caldendrin, calneurons, NCS-1, and PI-4K $\beta$ . Shown is a schematic representation as predicted from their cDNA sequences. The main sequence features including EF-hand structures, N-myristoylation, the lipid kinase unique (LKU), catalytic domain, and the Frequentin/NCS-1 binding site (Freq) in PI-4K $\beta$  are depicted. (B) Overexpression of calneuron-1, calneuron-2, caldendrin, NCS-1 GFP-fusion constructs, and a GFP-control in COS-7 cells. Syntaxin-6 (blue) immunofluorescence staining was used as a TGN marker. Note that calneurons as compared with NCS-1 and caldendrin are particularly abundant at the Golgi. Importantly, they show a very good colocalization with PI-4K $\beta$  (red) on confocal laser scans.



















**Table S2. Molar binding activity of his-SUMO-Calneuron-1 surfaces for PI-4KB-GST under different Ca<sup>2+</sup>/Mg<sup>2+</sup> conditions**

| His-SUMO-Calneuron-1<br>immobilized,<br>ng/mm <sup>2</sup> | PI-4KB-GST,<br>$\mu$ M | Ca <sup>2+</sup> concentration,<br>$\mu$ M | Mg <sup>2+</sup> concentration,<br>$\mu$ M | Signal,<br>RU | Molar binding<br>activity |
|------------------------------------------------------------|------------------------|--------------------------------------------|--------------------------------------------|---------------|---------------------------|
| 7.6                                                        | 5                      | 0,2                                        | 0                                          | 74            | 3.9E10 <sup>-3</sup>      |
| 7.7                                                        | 5                      | 0,2                                        | 200                                        | 80            | 4E10 <sup>-3</sup>        |
| 7.8                                                        | 5                      | 0,4                                        | 0                                          | 62            | 3.6E10 <sup>-3</sup>      |
| 7.7                                                        | 5                      | 0,4                                        | 200                                        | 75            | 3.9E10 <sup>-3</sup>      |

**Table S3. Thermodynamic and Ca<sup>2+</sup> and Mg<sup>2+</sup> binding parameter obtained for Calneuron-1 and Calneuron-2 calculated by ITC**

| Proteins                                                  | Model                                     | Association constant<br>$K_A, M^{-1}$ | Dissociation constant<br>$K_D, \mu M$ | $\Delta H,$<br>kcal/mol | $T\Delta S,$<br>kcal/mol | $\Delta G^\circ,$<br>kcal/mol |
|-----------------------------------------------------------|-------------------------------------------|---------------------------------------|---------------------------------------|-------------------------|--------------------------|-------------------------------|
| Calneuron 1 Mg <sup>2+</sup> binding                      | Does not bind                             | -                                     | -                                     | -                       | -                        | -                             |
| Calneuron 1 Ca <sup>2+</sup> binding                      | 1 set of sites                            | $5.38 \times 10^6$                    | 0.18                                  | $-3.75 \pm 0.058$       | 5.57                     | -9.32                         |
| Calneuron2* Mg <sup>2+</sup> binding                      | Does not bind                             | -                                     | -                                     | -                       | -                        | -                             |
| Calneuron 2* Ca <sup>2+</sup> binding                     | 1 set of sites (sequential binding sites) | $4.34 \times 10^6$                    | 0.23                                  | $-3.43 \pm 0.368$       | 5.51                     | -8.94                         |
| Myr-NCS-1 Mg <sup>2+</sup> binding                        | 1 set of site                             | $3.97 \times 10^4$                    | 25.18                                 | $-6.84 \pm 0.52$        | -0.463                   | -6.37                         |
| Mg <sup>2+</sup> bound Myr-NCS-1 Ca <sup>2+</sup> binding | 2 set of sites                            | $1.96 \times 10^6$                    | 0.89                                  | $-1.61 \pm 0.13$        | 7.12                     | -8.73                         |
|                                                           |                                           | $6.43 \times 10^5$                    |                                       | $-42.32 \pm 13.8$       | -34.23                   | -8.09                         |

Data on myristoylated NCS-1 are also included .

\* MBP-tagged protein was used.
